# Supplementary material for: The Impact of Spring Festival Travel on Epidemic Spreading in China
Source: MDPI journal article supplement (doi:10.3390/v15071527), 2023-07-10
Supplement: s1 [file s1]

## Supplementary Material

We further simulated the epidemic spread under different  $R_0$  in supplementary information. [Figure S1](#), [S2](#), [S3](#), [S4](#), [S5](#), [S6](#) show the peak timing and peak magnitude for each city at  $R_0$  of 10, 5, and 2.

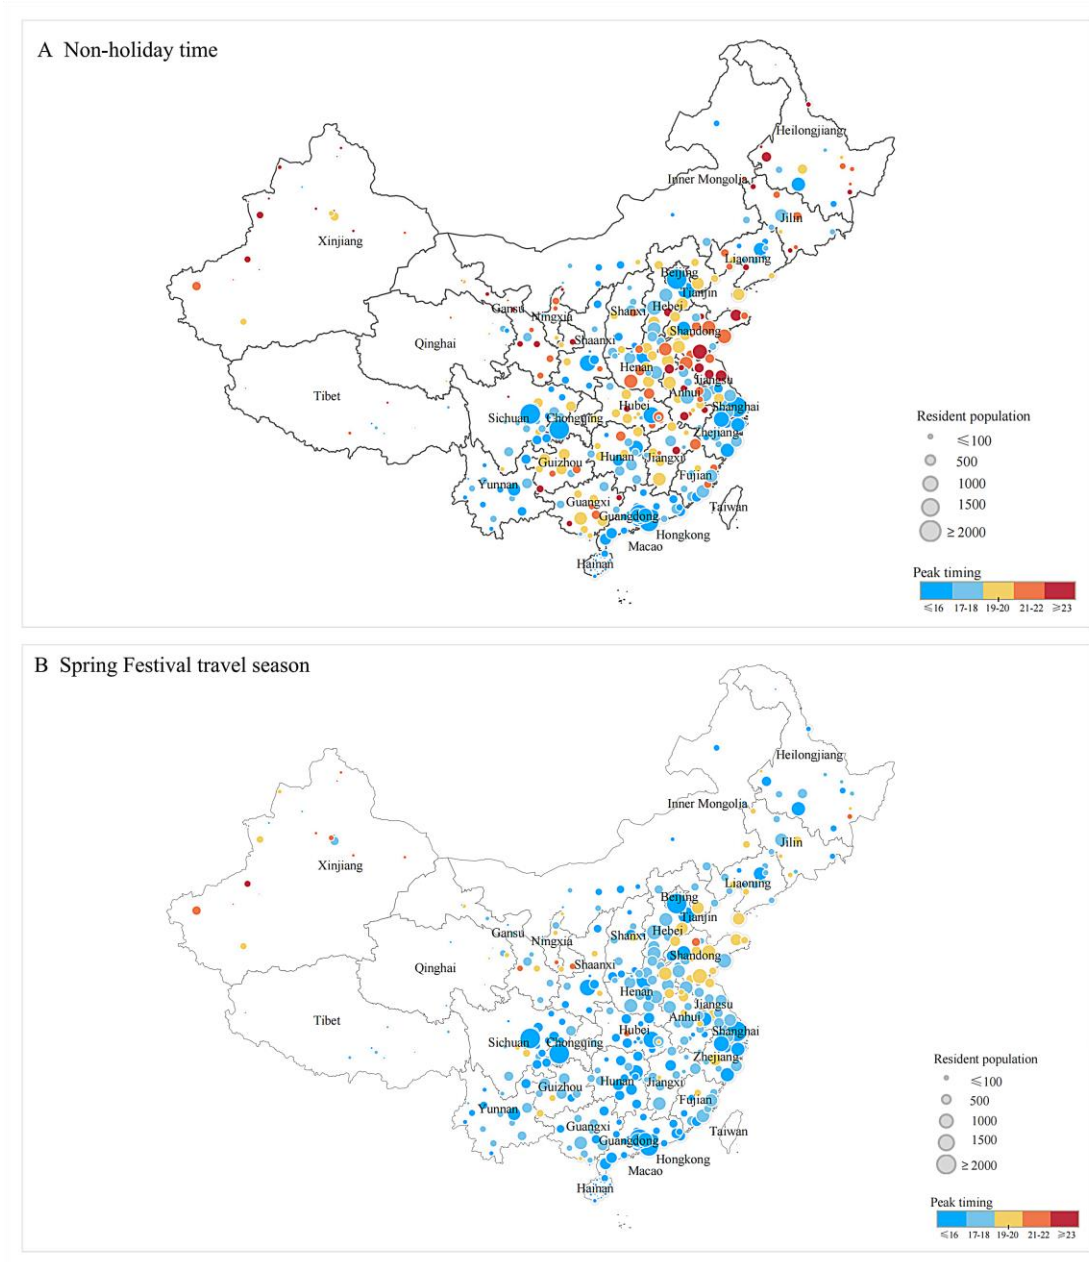

**Figure S1** When  $R_0 = 10$ , the peak timing of cities in (A) non-holiday time and (B) Spring Festival travel season. The unit of resident population is 10,000 people. The unit of peak infection period is the day.

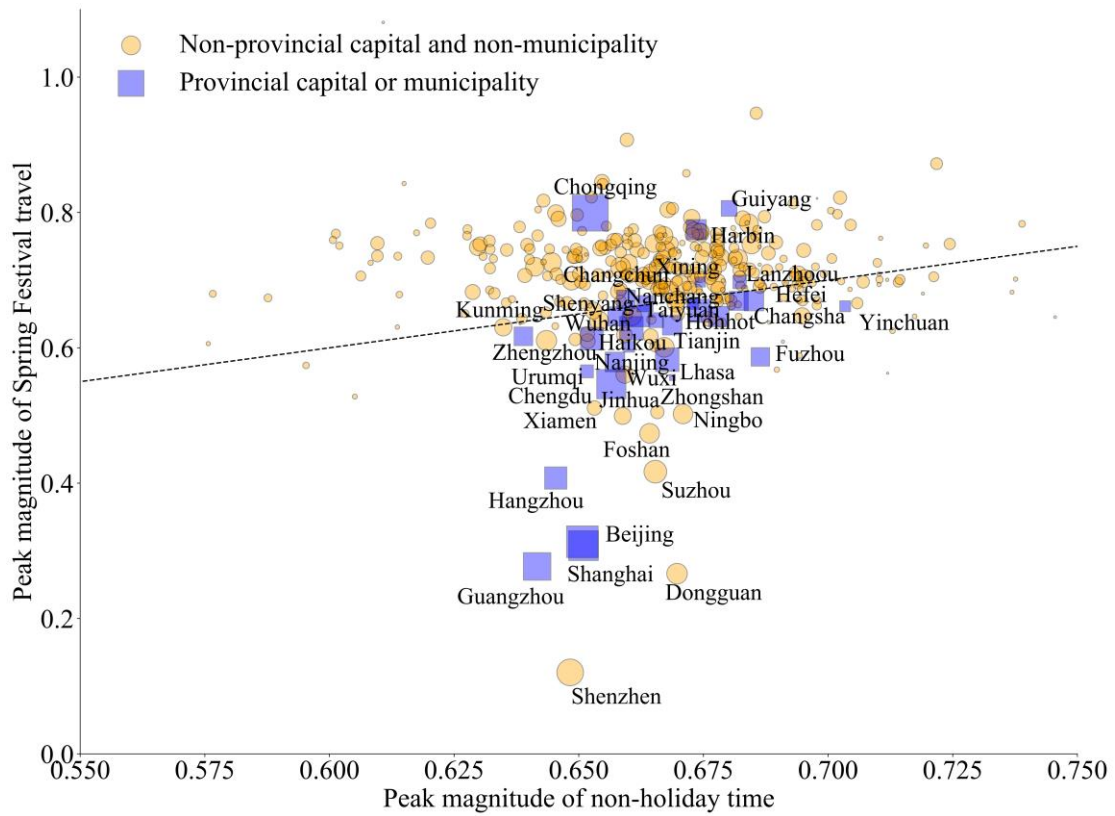

**Figure S2** When  $R_0 = 10$ , the peak magnitude in each city during non-holiday time and Spring Festival travel season. The size of the node indicates the number of resident populations, and the blue square is the provincial capital or municipality. The dotted line is the diagonal line  $y=x$ .

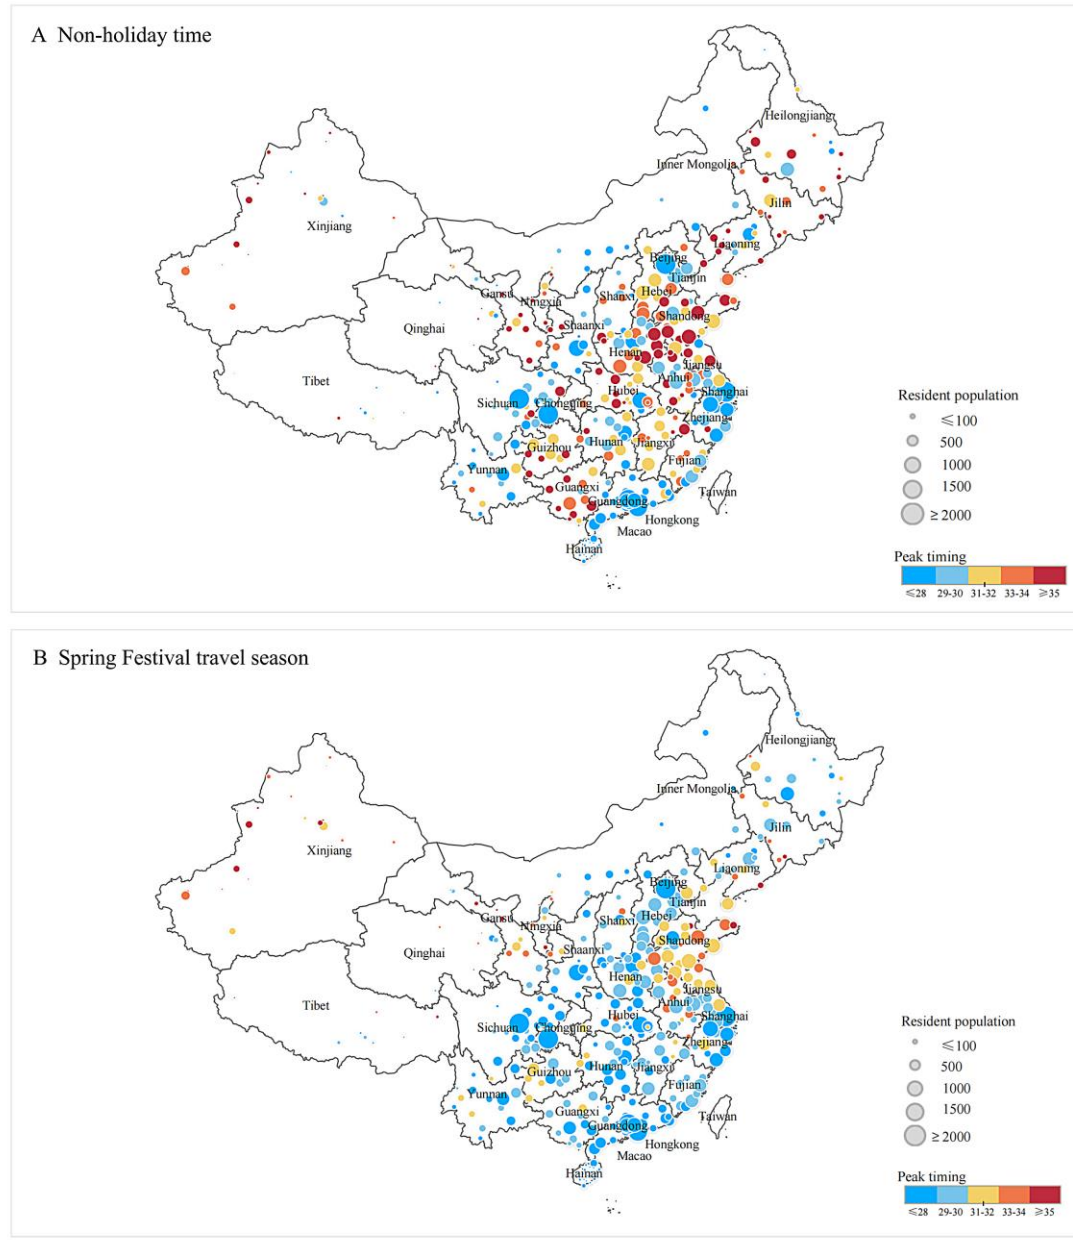

**Figure S3** When  $R_0 = 5$ , the peak timing of cities in (A) non-holiday time and (B) Spring Festival travel season. The unit of resident population is 10,000 people. The unit of peak infection period is the day.

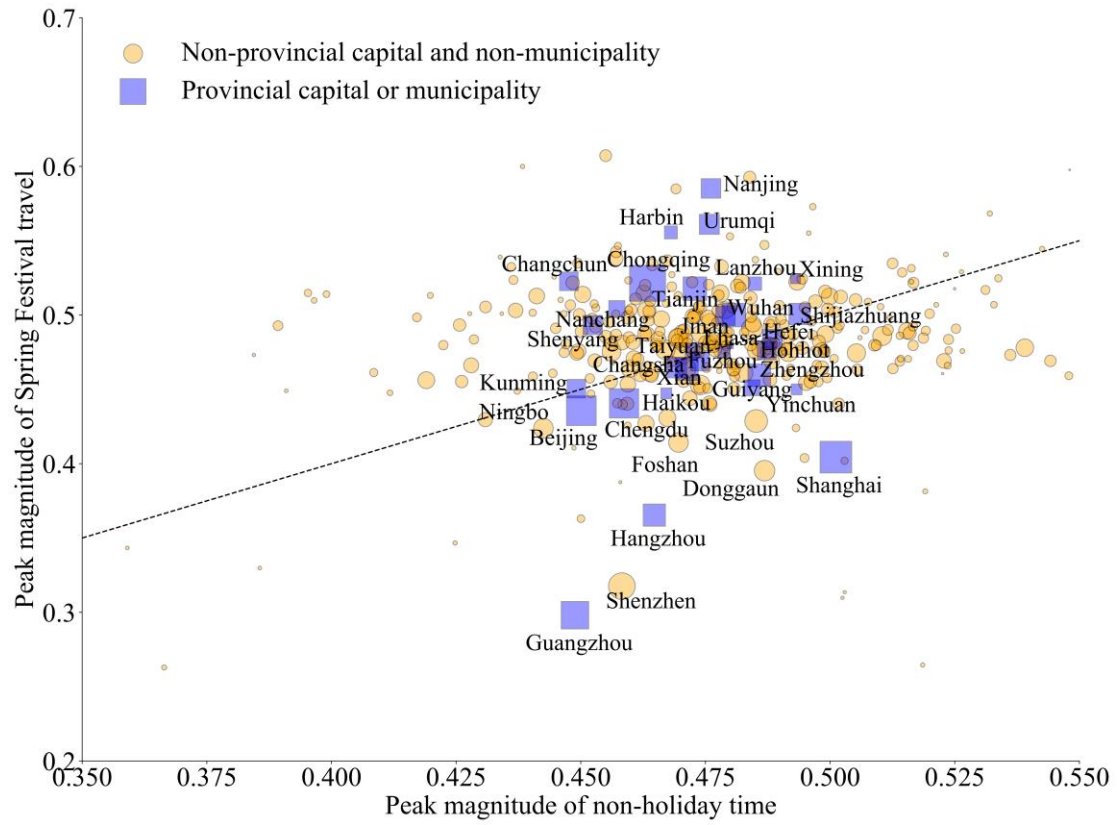

**Figure S4** When  $R_0 = 5$ , the peak magnitude in each city during non-holiday time and Spring Festival travel season. The size of the node indicates the number of resident populations, and the blue square is the provincial capital or municipality. The dotted line is the diagonal line  $y=x$ .

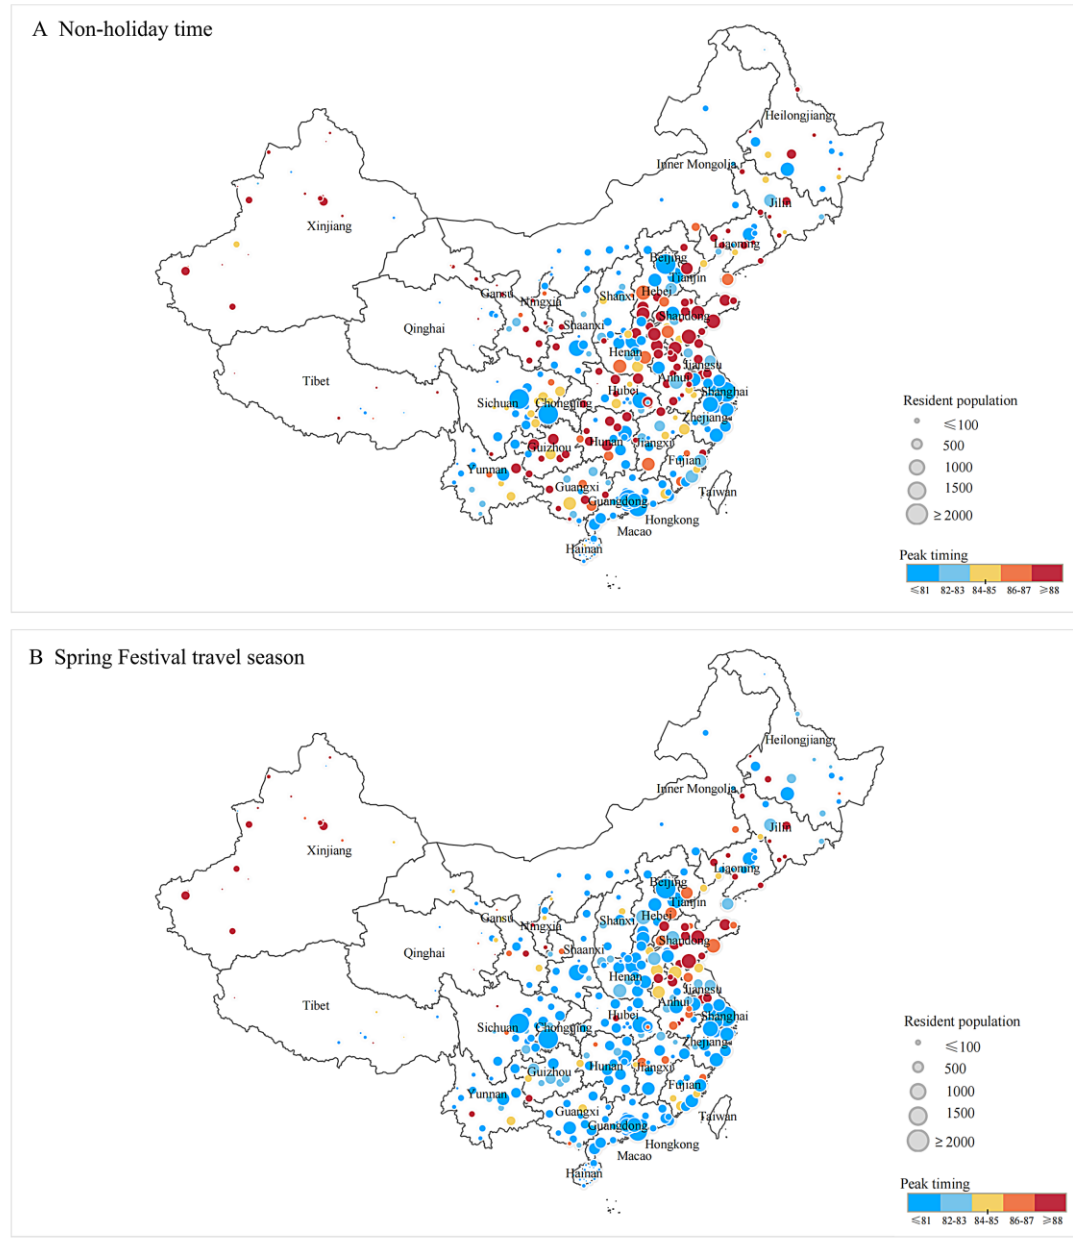

**Figure S5** When  $R_0 = 2$ , the peak timing of cities in (A) non-holiday time and (B) Spring Festival travel season. The unit of resident population is 10,000 people. The unit of peak infection period is the day.

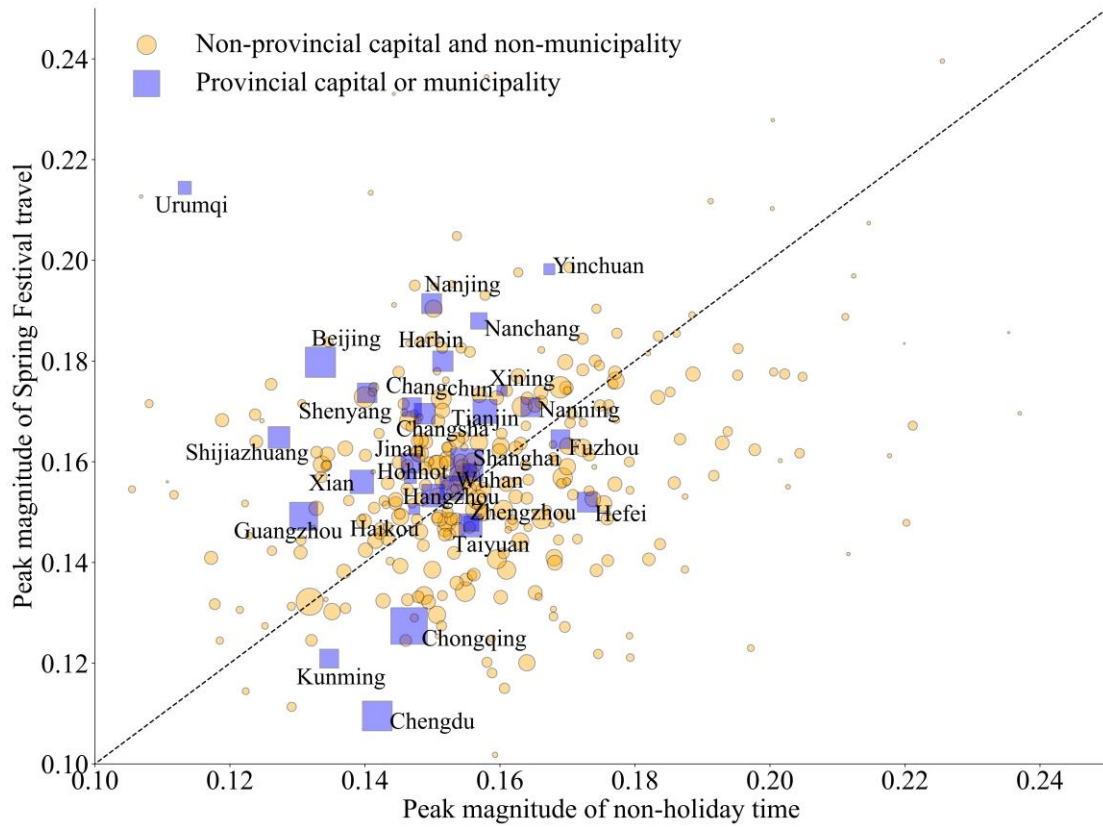

**Figure S6** When  $R_0 = 2$ , the peak magnitude in each city during non-holiday time and Spring Festival travel season. The size of the node indicates the number of resident populations, and the blue square is the provincial capital or municipality. The dotted line is the diagonal line  $y=x$ .
